# Supplementary material for: Oxygen storage capacity of Sr3Fe2O7−δ having high structural stability
Source: Royal Society of Chemistry journal article supplement (doi:10.1039/c5ta01588j), 2015-01-01
Supplement: c5ta01588j1.pdf [file c5ta01588j1.pdf]

## Supporting Information

### **Oxygen Storage Capacity of $\text{Sr}_3\text{Fe}_2\text{O}_{7-\delta}$ Having High Structural Stability**

*Kosuke Beppu, Saburo Hosokawa\*, Kentaro Teramura, Tsunehiro Tanaka\**

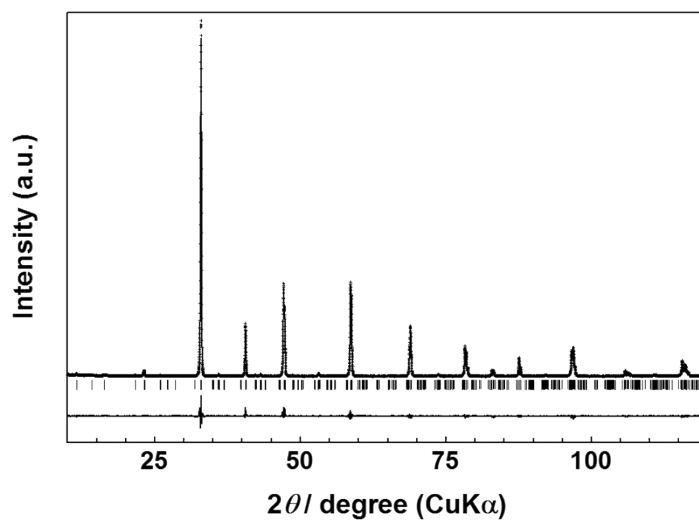

**Fig. S1.** Result of Rietveld analysis of  $\text{SrFeO}_{3-x}$ :  $\text{SrFeO}_{3-x}$  adopts the  $I4/mmm$  space group,  $a = 10.934 \text{ \AA}$ ,  $c = 7.702 \text{ \AA}$ , Sr1 on  $8i$  (0.258, 0, 0), Sr2 on  $8j$  (0.252, 0, 0), Fe1 on  $4e$  (0, 0, 0.254), Fe2 on  $8f$  (0.25, 0.25, 0.25), Fe3 on  $4d$  (0.5, 0, 0.25), O1 on  $2b$  (0, 0, 0.5), O2 on  $16m$  (0.120, 0.120, 0.223), O3 on  $8h$  (0.240, 0.240, 0.5), O4 on  $16k$  (0.124, 0.624, 0.25) and O5 on  $4c$  (0.5, 0, 0) with 100% occupancy (Sr1, Sr2, Fe1, Fe2, Fe3, O1, O2, O3, O4) and 86% occupancy (O5),  $R_{\text{wp}} = 10.3 \%$ ,  $S = 1.1$ .

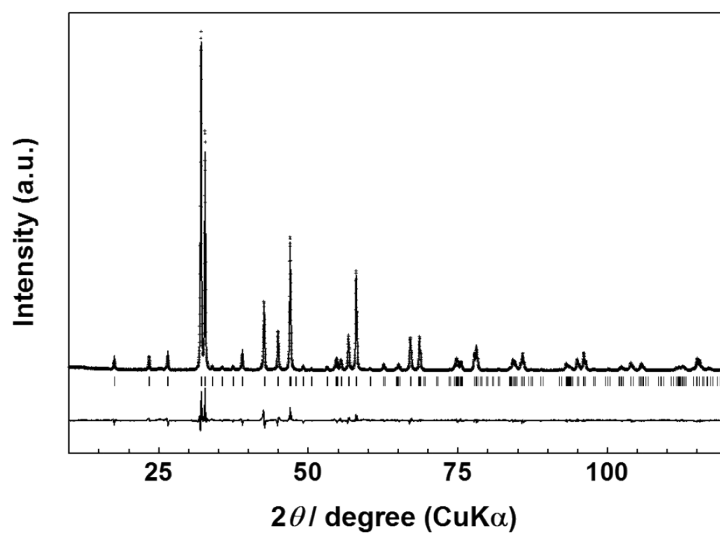

**Fig. S2.** Result of Rietveld analysis of  $\text{Sr}_3\text{Fe}_2\text{O}_{7-y}$ :  $\text{Sr}_3\text{Fe}_2\text{O}_{7-y}$  adopts the  $I4/mmm$  space group,  $a = 3.865 \text{ \AA}$ ,  $c = 20.157 \text{ \AA}$ , Sr1 on  $2b$  (0, 0, 0.5), Sr2 on  $4e$  (0, 0, 0.317), Fe on  $4e$  (0, 0, 0.098), O1 on  $8g$  (0, 0.5, 0.095), O2 on  $4e$  (0, 0.5, 0.194) and O3 on  $2a$  (0, 0, 0) with 100% occupancy (Sr1, Sr2, Fe, O1, O2) and 75% occupancy (O3),  $R_{\text{wp}} = 11.9\%$ ,  $S = 1.5$ .

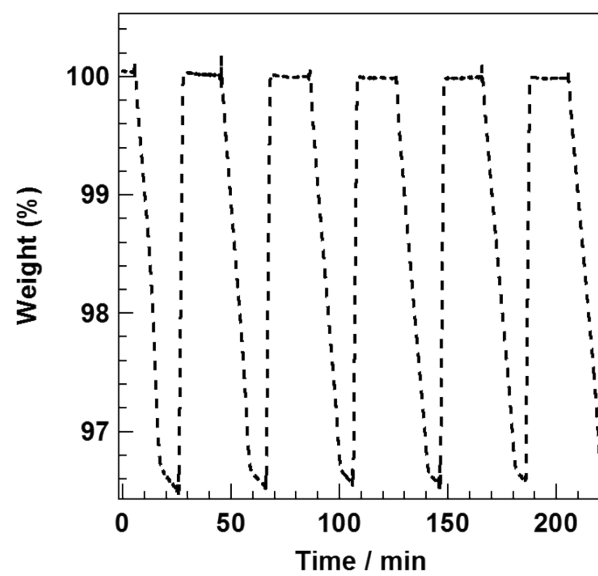

**Fig. S3.** OSC profile of  $\alpha\text{-Fe}_2\text{O}_3$  itself at 773 K.

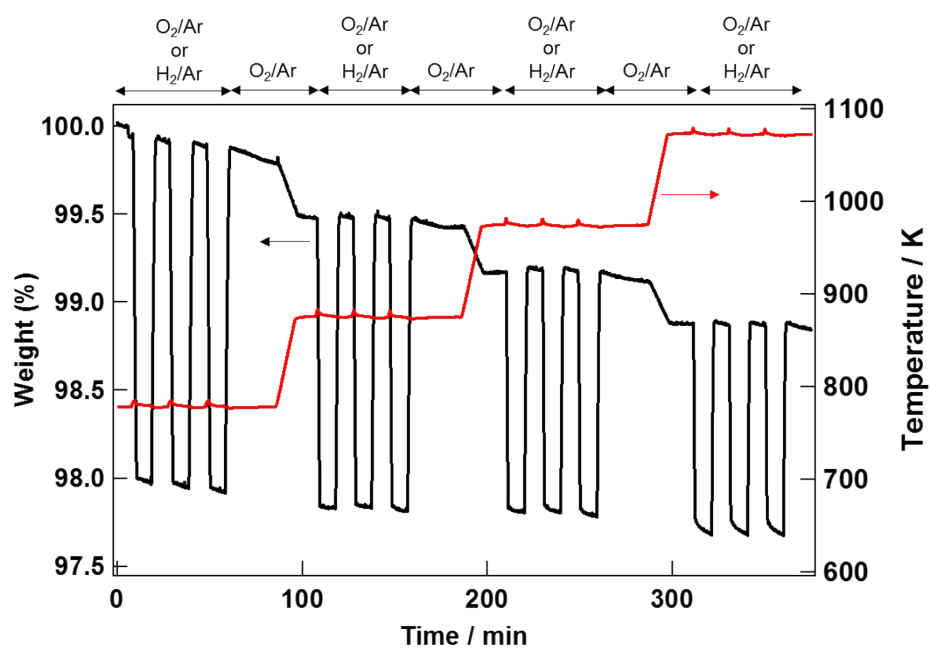

**Fig. S4.** OSC profile of  $\text{Sr}_3\text{Fe}_2\text{O}_{7-y}$  at various temperatures.

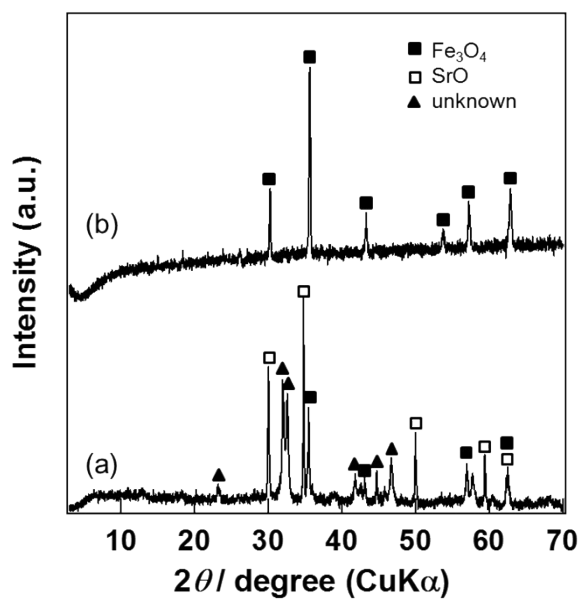

**Fig. S5.** XRD patterns of the products obtained by the reduction at 773 K of the physically mixed sample (a) and  $\alpha$ -Fe<sub>2</sub>O<sub>3</sub> itself (b).

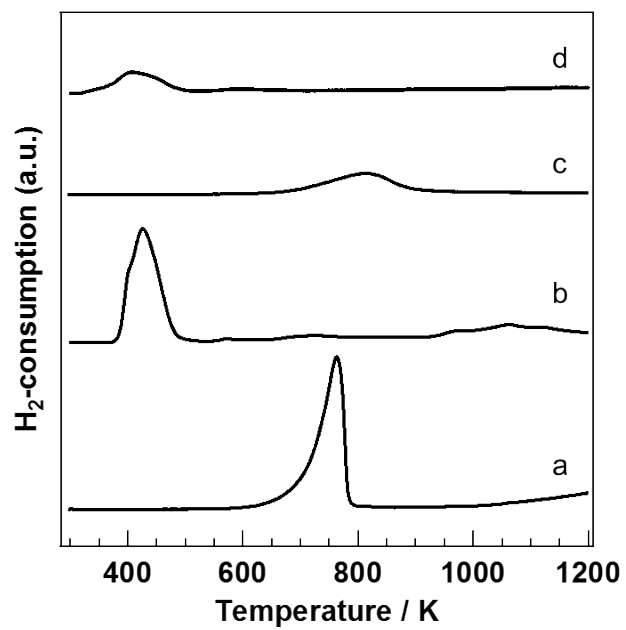

**Fig. S6.** TPR profiles of  $\text{Sr}_3\text{Fe}_2\text{O}_{7-y}$  (a),  $\text{Pt}/\text{Sr}_3\text{Fe}_2\text{O}_{7-y}$  (b),  $\text{Ce}_2\text{Zr}_2\text{O}_8$  (c), and  $\text{Pt}/\text{Ce}_2\text{Zr}_2\text{O}_8$  (d).

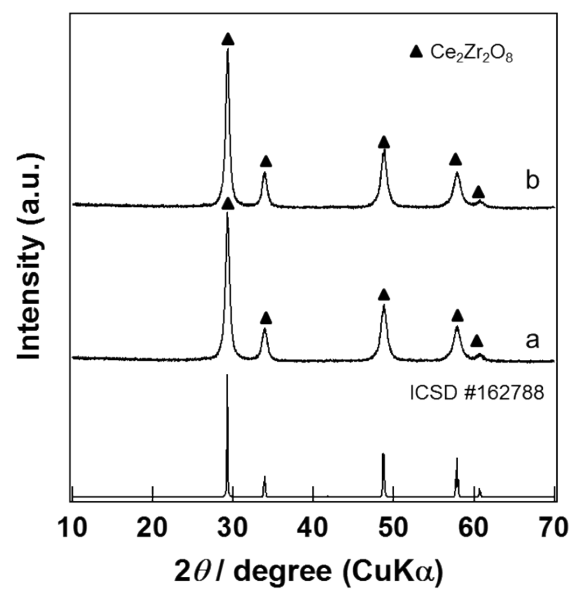

**Fig. S7.** XRD patterns of  $\text{Ce}_2\text{Zr}_2\text{O}_8$  (a) and  $\text{Pt/Ce}_2\text{Zr}_2\text{O}_8$  (b).
